# Supplementary material for: Multiplex Digital Quantification of β-Lactamase Genes in Antibiotic-Resistant Bacteria by Counting Gold Nanoparticle Labels on Silicon Microchips
Source: MDPI journal article supplement (doi:10.3390/bios12040226), 2022-04-09
Supplement: s1 [file s1]

# Multiplex Digital Quantification of $\beta$ -Lactamase Genes in Antibiotic-Resistant Bacteria by Counting Gold Nanoparticle Labels on Silicon Microchips

Galina V. Presnova<sup>1</sup>, Denis E. Presnov<sup>2,3,4</sup>, Anna A. Filippova<sup>1</sup>, Ilia I. Tsiniaykin<sup>3,4</sup>, Mariya M. Ulyashova<sup>1</sup> and Maya Yu. Rubtsova<sup>1,\*</sup>

<sup>1</sup> Department of Chemistry, Lomonosov Moscow State University, 119991 Moscow, Russia; gkovba@enzyme.chem.msu.ru (G.V.P.); iiffii@mail.ru (A.A.F.); umarusya@mail.ru (M.M.U.)

<sup>2</sup> D.V. Skobeltsyn Institute of Nuclear Physics, M.V. Lomonosov Moscow State University, 119991 Moscow, Russia; denis.presnov@physics.msu.ru

<sup>3</sup> MSU Quantum Technology Centre, 119991 Moscow, Russia; ii.tcinyaykin@physics.msu.ru

<sup>4</sup> Cryoelectronics Lab, Faculty of Physics, M.V. Lomonosov Moscow State University, 119991 Moscow, Russia

\* Correspondence: myr@enz.chem.msu.ru

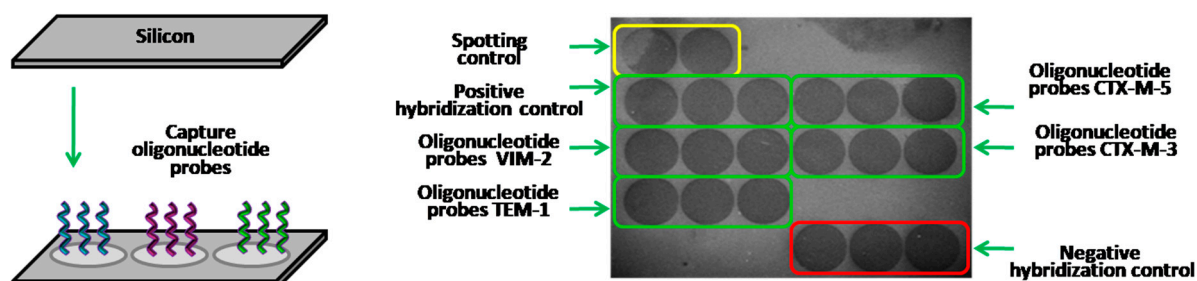

**Figure S1.** The microchip fabrication scheme and the layout of the capture probes.

(a)

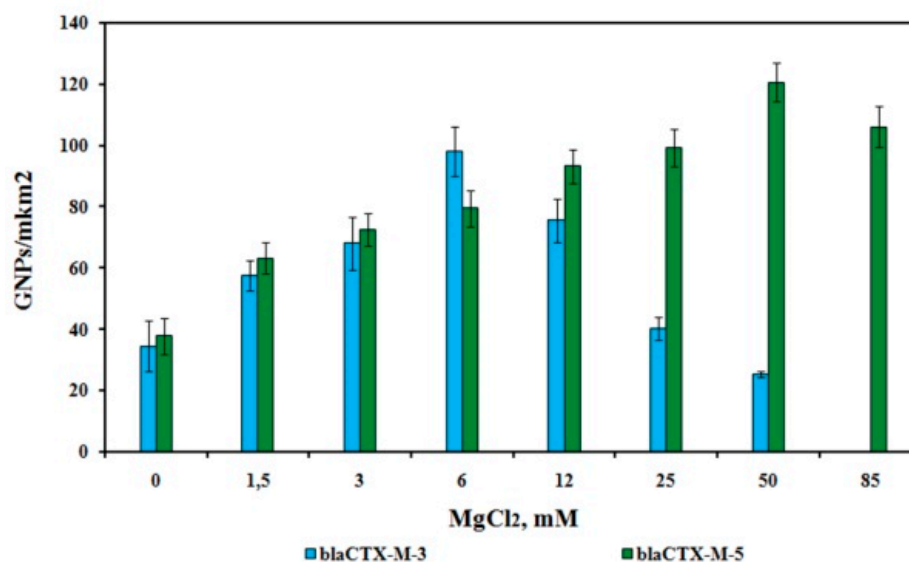

(b)

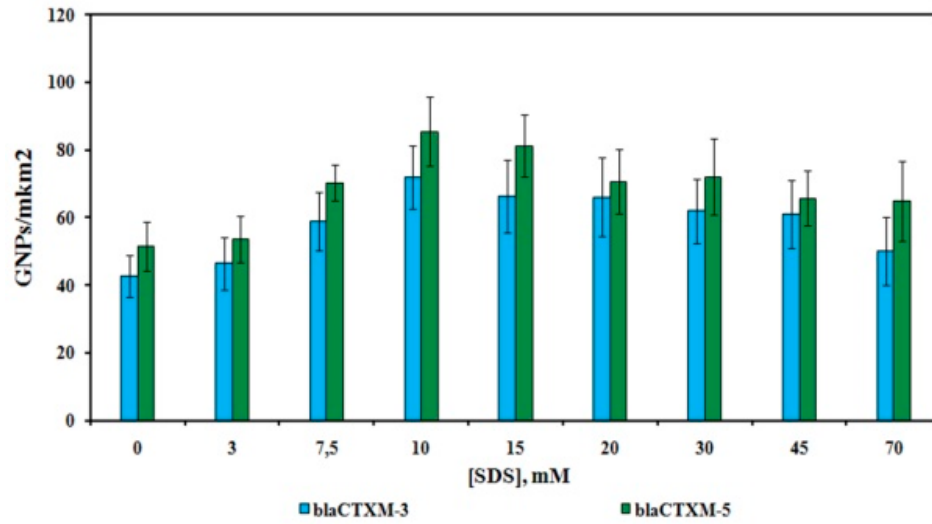

**Figure S2.** Effect of  $Mg^{2+}$  (a) and SDS (b) concentrations on the GNPs' density on specific microchip spots corresponding to immobilized Probe A and Probe CTX-M after the hybridization with 100 pM target DNA, containing *bla*CTX-M-3 and *bla*CTX-M-5.

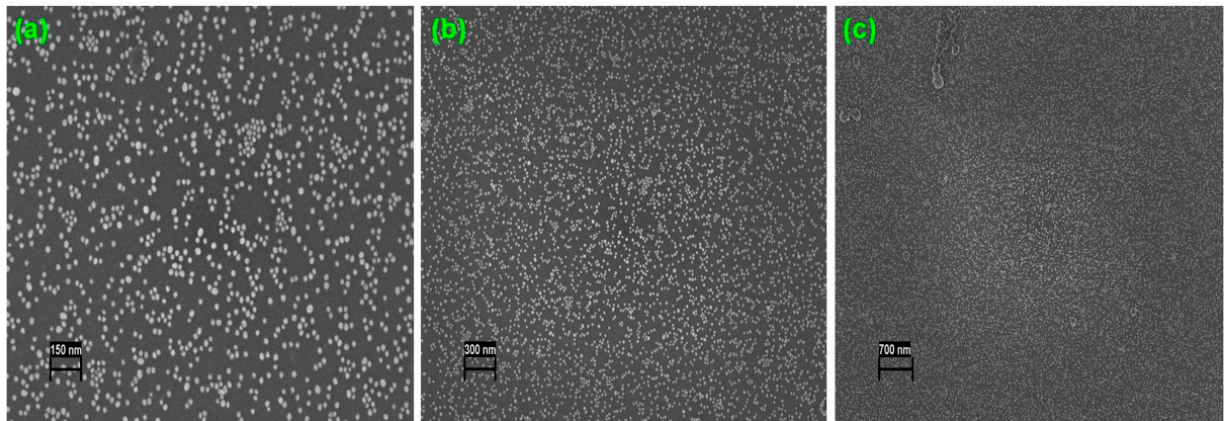

**Figure S3.** SEM images of the specific microchip spots after hybridization with 500 pM short target Probe C obtained at different magnifications of the microscope: 150KH (a), 75KH (b), 35KH (c).
